# Supplementary material for: New Yarrowia lipolytica chassis strains for industrial enzyme production
Source: Research Square preprint supplement (doi:10.21203/rs.3.rs-6269806/v1), 2025-04-01
Supplement: Supplementary file 1 [file b42be74f8247e2f07292033d.docx]

**Additional file**

**New *Yarrowia lipolytica* chassis strains for industrial enzyme production**

Djamila Onesime1ǂ, Esteban Lebrun1, Goran Stanajic Petrovic1, Ewelina Celińska2 and Jean-Marc Nicaud1

**Author affiliations**

1Université Paris-Saclay, INRAE, AgroParisTech, Micalis Institute, 78350 Jouy-en-Josas, France

2Department of Biotechnology and Food Microbiology, Poznan University of Life Sciences, ul. Wojska Polskiego 48, 60-637 Poznań, Poland

**ǂCorresponding author**

Université Paris-Saclay, INRAE, AgroParisTech, Micalis Institute, UMR1319, domaine de Vilvert, 78350 Jouy-en-Josas, France

Tel: +33 1 74 07 16.90

Email: [djamila.onesime@inrae.fr](mailto:djamila.onesime@inrae.fr)

**Keywords:** *Yarrowia lipolytica*, Chassis strain, Recombinant proteins, Protein production, Hybrid promoter, Glucoamylase, Transcription factor

**Additional Tables**

***Additional Table S1 List of Yarrowia lipolytica strains used in this study***

The strain names in the BIMlip strain collection, the genotypes and the phenotype in parentheses, and the corresponding references. Auxotrophies are as follow; for uracil (Ura-), for leucine (Leu-) and for lysine (Lys-).

| **Strain name** | **Description** | **Reference** |
| --- | --- | --- |
| JMY7126  JMY8647  JMY8695  JMY9431  JMY9438  JMY9443  JMY9446  JMY9449  JMY9450  JMY9451  JMY9452 | MatA ura3-302, leu2-270-LEU2t-ZETA, xpr2-322, Δlip2, Δlip7, Δlip8, Δlys5, Δeyk1 (Ura−, Lys−)  JMY7126, Δmhy1 (Ura−, Lys−)  JMY8647, leu2-270 Δ LEU2 (Ura−, Lys-, Leu−)  JMY8695, ΔYALI0D25278g_HXM1 (Ura−, Lys-, Leu−)  JMY9431, ΔYALI0B05654g_AXP1 (Ura−, Lys-, Leu−)  Y9438, ΔYALI0E20823g_YPS3 (Ura−, Lys-, Leu−)  Y9443, ΔYALI0E10175g_YPS1 (Ura−, Lys-, Leu−)  Y9446+ ΔYALI0D10835g_YPS4 (Ura−, Lys-, Leu−)  Y9449+ΔYALI0F27071g_Protease3 (Ura−, Lys-, Leu−)  Y9450+ΔYALI0D02024g_Protease5 (Ura−, Lys-, Leu−)  Y9450+ΔYALI0D02024g_Protease5 (Ura−, Lys-, Leu−) | [1]  [2]  This study  This study  This study  This study  This study  This study  This study  This study  This study |

***Additional Table S2 List of plasmids used in this study (E. coli)***

The plasmids used in this study. Plasmid name in BIMlip *E. coli* strain collection. Replicative donner Cas9 vector containing the corresponding target sequence for the indicated specific gene to be deleted containing the excisable *LEU2* or the *LYS5* marker. Plasmid pUC57 derivatives containing the disruption PT cassettes (AmpR) synthetized by Genecust). The suffix “-ex” in a marker indicates that it is excisable using a Cre-*lox* recombination system [3].

| **Plasmids** | **Description** | **Reference** |
| --- | --- | --- |
| JME3267  JME4390 | ***PUT lys5::URA3***  GGA_*LEU2*ex_CrisprCas9-yl_RFP | [5]  [34] |
| JME4393 | GGA_*LYS5*ex_CrisprCas9-yl_RFP | [34] |
| JME5329 | JME4393+gRNAYl-Leu2_up1 (gEL042) | This study |
| JME5780 | JME4390 + gRNAYl-HXM1-up | This study |
| JME5489 | JME4393 + gRNAYl-HXM1-cds | This study |
| JME5778 | JME4390 + gRNAYl-Axp1-up | This study |
| JME5789 | JME4393 + gRNAYl-Axp1-cds | This study |
| JME5333 | JME958 + gEL046 Disruption cassette PT-Leu2-Zeta | This study |
| JME5757 | JME4390 + gRNAYl-Prot3-up | This study |
| JME5758 | JME4390 + gRNAYl-Prot5-up | This study |
| JME5759 | JME4390 + gRNAYl-Yps1-up | This study |
| JME5760 | JME4390 + gRNAYl-Yps3-up | This study |
| JME5761 | JME4390 + gRNAYl-Yps4-up | This study |
| JME5397 | JME4393 + gRNAYl-Prot3-cds | This study |
| JME5398 | JME4393 + gRNAYl-Prot5-cds | This study |
| JME5399  JME5400  JME5401  JME5787  JME5788  JME5402  JME5403  JME5404  JME5405  JME5406 | JME4393 + gRNAYl-YPS1-cds  JME4393 + gRNAYl-Yps3-cds  JME4393 + gRNAYl-Yps4-cds  pUC57 (AmpR) + AXP1 disruption synthetic PT Cassette  pUC57(AmpR) + HXM1 disruption synthetic PT Cassette  pUC57 (AmpR) + Prot3 disruption synthetic PT Cassette  pUC57 (AmpR) + Prot5 disruption synthetic PT Cassette  pUC57 (AmpR) + YPS1 disruption synthetic PT Cassette  pUC57 (AmpR) + YPS3 disruption synthetic PT Cassette  pUC57(AmpR) + YPS4 disruption synthetic PT Cassette | This study  This study  This study  This study  This study  This study  This study  This study  This study  This study |
| JME547  RIE124  RIE132  JME721 (JMP140)  JME5579  JME5840  JME5670  JME5844  JME5850  JME5843  ECB252 | pUB4-Cre-HygR  PUT *eyk1*::*URA3ex*  pGEMT-easy-Cre-*EYK1*  pKS LEU2-Zeta  JMP62-URA3ex-pEYL1-5AB-RFP  JMP62-LYS5ex-pEYL1-5AB-AmilCP  JMP62-LEU2ex-pEYL1-5AB-RFP  JMP62-LEU2ex-pEYL1-5AB-GA  JMP62-LYS5ex-pEYL1-5AB- GA  JMP62-URA3ex-pEYL1-5AB- GA  JMP62-LYS5ex-pTEF-KLF1 | [5]  [5]  [5]  [65]  [5]  This study  [5]  This study  This study  This study  This study |

***Additional Table S3 List of SgRNA target sequences used in this study***

The guide target sequence for the specific gene deletion for the construction of the *Y. lipolytica* strains. The systematic YALI gene name of the corresponding genes are abbreviated with the chromosome letter and the gene number as follow: for gene *YALIB21582g* coding for the *MHY1* gene was abbreviated as B21582g. The position is indicated from the Start codon.

| **Guides Primers (SgRNA)** | **Target sequence** | **Position from Start codon** |
| --- | --- | --- |
| SgRNA_B21582g_MHY1_162-cds  SgRNA_LEU2_up1  SgRNA_D25278g_HXM1_up2  SgRNA_D25278g_HXM1_CDS  SgRNA_B21582g_AXP1_up  SgRNA_B21582g_AXP1_CDS  SgRNA_F27071g_Prot3_up  sgRNA_F27071g Prot3_cds  SgRNA_D02024g_Prot5_up  sgRNA_D02024Prot5_cds  SgRNA_E10175g_Yps1_up  SgRNA_E10175g_Yps1_CDS  SgRNA_E20823g_Yps3_up  SgRNA_E20823g_Yps3_CDS  SgRNA_D10835g_Yps4_up  SgRNA_D10835g_Yps4_CDS | ggcgacagcatgtaaatggg  GCACTTTTGCCCGTGCTATG  AAGTGAACGTAGTGACGACG  ACCCACCGCTCGGGCCACGT  TCTGCTTGCAATGAAGCTGT  AGTTCCACGAGCAAGGACAC  GTAGCAACGATATATGTACA  TCGTCCTCTTACAAGGCTAA  TAAAGTGCGATGCTGGGTGC  TTCGTCCCCATCGAACAGGA  TGGTCCCTCGAGAGTGTATC  GGAAGCGGCAATCCCGATTG  TCAGGGAAAACACTAAGGAC  CAGGGACCACTTCCACAACC  GAGAGTAGACCTCGTCGGTT  GGATACCGACGCTAACTCCG | +162 bp  -99 bp  -44 bp  +493 bp  -60 bp  +330 bp  -70 bp  +550 bp  - 50 bp  +237 bbp  -67 bp  +324 bp  -82 bp  +478 bp  -248 bp  +428 bp |

***Additional Table S4 List of Primers used in this study.***

**A)** Primer pairs used for disruption cassettes amplification. **B)** primer pairs for gene deletion verification, the primers for gen deletion verification are located just upstream and downstream form the primers used for PT amplification. Abbreviations are forward (fw) and revers (Rv) primers**. C)** Primers pairs used for loci PCR and sequencing

***Additional Table S4A List of Primers used for disruption cassettes amplification***

| **Primer name** | **Sequence 5‘ to 3’** |
| --- | --- |
| P2_HXM1_fw  T2_HXM1_rv  P_AXP1_fw  T_AXP1_rv  oGS_11_PCR_PTProt3_Fw  oGS_12_PCR_PTProt3_Rv  oGS_13_PCR_PTProt5_Fw  oGS_14_PCR_PTProt5_Rv  oGS_15_PCR_PTYps1_Fw  oGS_16_PCR_PTYps1_Rv  oGS_17_PCR_PTYps3_Fw  oGS_18_PCR_PTYps3_Rv  oGS_19_PCR_PTYps4_Fw  oGS_20_PCR_PTYps4_Rv | AGTGCGTCTAAGCTGCATCC  GAAGGAGAACTCGTGGGGTTT  TGGTTAAGGCACATCAGGG  GTAGATCGTCAGGTGAGTTTTC  TTACAGCGTCCACAGGTGTG  CAAAGGCAACACAGTGCAG  TCAATCGCTGCATGGCTG  GTGCGGTCTTTGTTTTTAGATC  AGGCGCTTAGCACACACATG  GTTCTGGCGATTTAGCCCCAATC  AAACTTATGAAACAGGCACAGATATAGTCAG  GTTTTACGACGCCGGCTCATG  GTTCGCCGCAAACAAGAGCGGTGTGTTTG  GCCGCTGCCGTGATCTCGAAGAAGGTGCTGAAG |

***Additional Table S4B List of Primers used for deletion verification***

Table of Primers used to verify gene deletion. the expected sizes of the band in the WT strain (WT) and in the deleted strains (delta) are indicated in base pair.

| **Primer name** | **Sequence 5’ to 3’** | **WT** | **Delta**  **wo PT insertion** | **Delta**  **with PT insertion** |
| --- | --- | --- | --- | --- |
| Ver_P_AXP1_fw  Ver_T_AXP1_rv  Ver_P_HXM1_fw  Ver_T_HXM1_rv  Ver_P_YPS1_fw  Ver_T_YPS1_rv  Ver_P_YPS3_fw  Ver_T_YPS3_rv  Ver_P_YPS4_fw  Ver_T_YPS4_rv  Ver_P_Prot3_fw  Ver_T_Prot3_rv  Ver_P_Prot5_fw  Ver_T_Prot5_rv | CCCATTTCTCGTCCTTGTCC  CACACACATGCACACAATTAC  ACGTGACAGGCAATTCTCCC  ACCCATCATCTCCTGAAGAC  ATCGCCCTATCCACGCAAAC  TCCCCCAAACCAATTACCTCAC  GAAAACCCAAACCAGCCAAC  TAAAGAGATGCCAGCCAGCC  GAAGGGCAGGTGAAAATAGG  CTCGAAGAAGGTGCTGAAG  ACTACAGCTACAGTTCGTACC  TCATCCATCTCTTCCTTGATCC  AAAAGCAGCAATAGGCGAC  TCCTCCCCTCTTCCTCAAAC | 2759  2597  3151  2838  3760  2938  3314 | 2056  2040  2740  2258  3064  2278  3007 | 1365  1539  1346  1251  1223  1384  1236 |

***Additional Table S4C List of Primers used for Loci verification and sequencing***

| **Primer name** | **Sequence 5‘ to 3’** |
| --- | --- |
| PCR_EYK1_fw  PCR_EYK1_rv  PCR_LIP2_fw  PCR_LIP2_rv  Seq_LIP2_fw  Seq_LIP2_rv  PCR_LIP7_fw  PCR_LIP7_rv  Seq_LIP7_fw  Seq_LIP7_rv  PCR_LIP8_fw  PCR_LIP8_rv  Seq_LIP8_fw  Seq_LIP8_rv  PCR_leu2-70_fw  PCR_leu2-70_rv  Seq_leu-2-70_fw  Seq_leu2-70_rv  PCR_Plys5_fw  PCR_TLys5_rv  Seq_PLys5_fw  Seq_Rlys5_rv  PCR_Amp_fw  PCR_Amp_rv  Fila-intern-verif-fw-2  Fila-intern-verif-Rev | GATGTTCTGGTGAGTGTGAGTGTGTA  GTGTTTGACATTTTGTTTTGTGTGAGT  GGCACAGACACATTCCATAG  GACATCAGTATCCAAGGCAC  CAATTGATACCCAAGTACCAGC  GCCTCCACCTGTGTCAATCTTCTC  ACGACGACTAATCATCGCC  TTGCTTCTCCCCTGCCTTAC  AACATGCTGGGCCAAAGAGG  TTACAGCAAGTCTACTCTACAGTG  CCACATGGCTGGATTATCTAC  TGCCTGCTAGACTAACATGAC  CTGTTCGGGTCATGTCAGGTATAC  AAGCCCAACAACCCTCCAAG  TCACTCCACACACCACATC  CACTAACCTACCAAACACCAC  CATCCACAATGGAACCCGAAAC  CACATCAGCCACAACTCCCTTC  cccattctcgaccaggactt  ggtgattagaagcggcagtg  gtctgatacgagcggcctat  cagtatttggcggtggtgagc  gctggtgaaagtaaaagatgc  Agataactacgatacgggagg  GCATCGCATCTAATCAGG  GTCGGAGCACGAAGAGGTGTCATGC |

**Additional Sequences**

**Sequences of loci modified JMY9438 strain**

***Coding Region(s)****;* Start & Stop codons; Intron Sequence; Untranslated Sequence (UTR); PCR_ fw/Rv *;* Seq_ fw/Rv, Guide target

***AXP1*_*YALI0B05654g* uniprot|Q92389 Acid extracellular protease**

TCTCATTGATAAGAGAAGTGAACTACTTGTAGCAGTGACAGTTCCCTATACTGCTTTTCGAACTGTACGAGGGCACACACGGCCTCCGAAGAAGCAAAAGTGAACGCCGAAGAAGCTCATTCGAGGCTATCAGTGTTCTAAAGATGTTGATCTCCTTGTGCCAATATGAACGGCACCAGCTGGTTAATGTGGGGTTGAGAGTGCGGAACCTTGTTCGAAGGCCCATTCTACTCTGTACACGATTTGCAACGGCCAGCGAGATATCAATGAGTACGGCGTGTATATGTCTCAGGGAGAAAAAAACTCCTTCGGGGTACGGAACCTCAAACACCACTGATCTCCTAACGGCTCTAGAGGAGAGTCCTCTTGAGCGATTGAGTCACTGAGGAGCAGGGTTCCATCAAGTCGCAGATAAAGAAACAAGCAAACAACGATGCCGTGTATCTCACACCCACCTCCAAGACCCTTGGAAGACCAGCCATGAACCTTAGCTTCCACCAAAGCCTGAACGGCACGATGCGATCGTGGCAATCCACGTGCAAGTGTAAATCAGTGTTTAATCTCGAAGCTTGCATGGTTTAGCAGGGGGCCGTCCTATAGTAACTGCACGATAGCGCCCTGCCAAGCGATGCCACGACGGTGCCAAGAAACATGGAATGTCCTAGTTTTGGAGTGGTGCGTTGCGGATTATGTTAGCGCTGTGTGTTACTGGGGGAATAGAGATACGCTCCCTCGCAGCTCAAACGTCAAGTGCACCCATATACTCGGTCGAGACCCATTTCTCGTCCTTGTCCAAAGTTTGACCCTGGTTAAGGCACATCAGGGCCTATCGTGATAAACAAGTACTGTACATCTGTATGTACGTGGGGGTACTGCGAAAACTGATAACGTTGAAATACAATGGCTTGAAATCGGTGTCGGTCTGAGTGAATTCTAGCGATTGTACGGCAAGATATATATTGGAGTCTCTCAATAACATATTGCTTTTGAATCAATGGTTTTGTTGGCTTCTGCTGGACCAAATACACGTCCCTTGGTGAGACAAACAAACACACCACGCCGTTATCGCCCACCTTATTTGCCTTCTAATACCGCACTATATTGGAACTTTCGACTCATTGACCATGCATCTCACCAGAGGCAATGACTGAGGACCAGGTCGAAGTAGCTGGCGGAAAAGTGGTTGTACCAGAAAACAGATTCACAACCTATAAATCACTTTGTGTGTGAGGACTCTGGAACTGCTCACGAGTGGTTCCAGGCTACTGGTAGTTCTATTCGAGCTCCAAAGCACATTAAGTTACGCTTGGTGAACTATAGCTTCTGGTCCTCTGCTTGCAATGAAGCTGTGGGTGGAGTAAACGGTGCCGCTTAATACAGGGATGGTGCGTGAGATAGGAGATTTGGAGCCGTCTACTCTGTCGGCCAACGACATAAATAGACCCCCTCAGTCACCTTAGACACAGCAGAATTCCACCAGATCAGCTTCCAATTCTAAAG**ATGCAGTTCTCTCTTGCCACCCTTACCACCCTCTTGGCCTTCGTTGCCGCAGCCCCCGCAAACAAGGGATTTGTTCATGCCCCTATCAAGAAGCAGTCCCTCCAGGCGGCCCAGAGCAAGATCCCCAACTTTGCCTCCTCCGGCCCCATCACTGCCGAGCTCTACAATGAGCTCATGGCTTACCAGGTTCAAATTTCTCTTGGTGGTCAGACTATCTCTGCCAGCATCGATACCGGATCCGAGATTCTGTGGGTTTGGGAGAACGACTCTATTGCTTGCCAGGTTGACCAGCAGGACTGCGACACTGACGGCTCTTACAACCCCAAGAAGAGTTCCACGAGCAAGGACACCGGAGTGCCTTTCAACATCAACTATGGCAAGGGACACGCTGATGGTTACCTCTACACTGATAATGCTGTCATTGGTGGAGCTTCCGCTCCTGGTTTCAAGTTTGGTGTCAACTCTGGTGATCTCAGCTCCGGCGGCTTCTCCATGGTCTTCGGTATCGGTGTGAACAGCGACGCCTCTACTTCCATCTCTGCTCAGCTCCAAAAGTCCGGCGAGATCTCCCGAAACCTTTACGGTATGTCATTCAGCGACGCCAACCTTGCTGGCACCAGCAACGACAACTCTGAGATCACCTTTGGTGCTATCAACACTGGTCGATACACTGGCTCGCTTAAGACCATTCCCCGAGTTGCGACCCAAGGCGGATACCAGCACTTTTCCGTTTCTGCCTCCGGAAAGTTTGGAGATGTCGACCTCTTCGACAATGACCTCGTCATTCTAGACTCTGGAACCACCATGACTTACCTCAAGTCGGACTACTACAACGCCTTCCTCGGCGGCCTCGAGGACCTTGATATCACCCTCAGTGACTACTCTGGAGGATGGCACGGATACCCTTGCTCTGAAAACTCGAAGATCAACTTCACTTACAACTTCAGCGGTAAGGAAATCACTGTGACTGGACACGACCTGGCCATTCCCGGCAACGCTGTCAACTCCAATGTTGACTCCTCAGTGTGTTTCATGGGTGTTGACGATGGTGGAAACATGAACCTGTTCGGTGACACCTTCCTGCGAGCCATTTACTCCGTCTACGATCTCGAGCGAGATGAGGTCTCTATTGCCCAGGCTGCCCATGGCAAGCCCGACAACTACGTGGTCATCACTGGTGATGTCCCCAACTAG**ACTATTATTATCTAGCATTTCTTCTACAAGAAGCCTTATGGCGACTATATAATTTAATTCATTAAAAATGTTCTATGCTAAATGGTGAGGCAGTGATTCAATTGCAGGTTCAACATTGTTGGATGCAATTCAAGTTTTCAATGCGCGCGGTGTTGTATTCGGCCCAGAGGAGGTCCAAAGACGAGTGGAACATGATCGCCAGGTGGAGCCTTTGGACTGAAATAATCAAAGAGCTCATTCAATTGGTTTTGTAGCTGCTCAAACTCCTTTTGAACGGTCTCAAGCTGCTTCTCCACCCCACAGATATTCTCCAGGTCGCGGGCTGCGAGATTCACGATGTGGGGGCTAAAAGATCTAATTGTCATTGTGACAATGATGGTGACGAGGGTTAATACCGTTAATACCTGCCAAAACACAGCTCTTATATATATATATATATATATATTTCTCGTAGGATATATGTGGCAAGAAGTGCATGAATCCAGGTGTCCCAATCCAGCAATATCAATGAAACAATATCTGTACATGTTAATTATCGCACATGCGGTGTGGAGAATACACATGTCTTTGTATTGTCAGAAAACCCCGCAGTGGGGTCTGTTTCATTCATTGGAAATAGCAGCAAAACGAAAACTCACCTGACGATCTACATAGGTGGTACGATGACTACAAGTAGTGCACATCATATGGCATGTCTTACCATCGTTCATTCTTTAGCTTCCATAGACGTTAATCTACAATGGATGGACCGAAGTAAAACTTTAGCCGCTTGCGATACGATACGATGCGATACTGTACTCGTACCTTCTGCTCTACTTGTAATTGTGTGCATGTGTGTGTATAAAATACTTGCTTCGCTCGCGTCTGAGTAACGTCTTGTCCCACCATTCATAATTCATTAATCATTATATCATATTTTCTGTTGTACATGTCGAAGGCAATTGACACCAAAGTTGATCAGAAGAATCTGTCGAGGGACAGAAACTTGGAAAGCTGGCCAACAATGTGTGAGCCTTCCTCCTCCTCGTTTTGTTGAGCTCTACACGATGCAGCTCTAGTGCTGGATCGAGTGGAGGGGGTTGAGATGGAGATTCGCCGAGCCTGAGGCTTCTTGGGCGGAGCTTCAGCCAACTTCATCTCCTGAACATCTTCGTTGGAGCCGGAATGAGAAGAAGCTCCAAATGAGGGTCGTAAACTAGGAGAACCAATGGGTGATGCGGTTCTAGACGGCTTCTGGGGAGTTCTGGACGAGGCTGTTTCACTGGAGTTTCCCGCAGACGAAGCGGCGGCTGTTGCTGCTGACGCTGCTGCTGTACCACCAGACTTCTTCCTGTTCTTTGTGAAGCCAGAAGACCGTCTCGCCGGCTTGTATCCCGAAGGTCTGTTACCATTAGCCTTTCCCTGGGCAATGAGCTCATCGACATTGAGCTTGAGTTTTCTCGCCTCTGCGATGACCCGCTGGAATGGCGTCGCATCTTCTCCCAGCTCCACTTGCTCCTCCTCATCTGACTCAGACTCACCCTCGAAGAGATGACTCTTTGGCACACTCTCCATGCTCGTCTTTACCAGCACTTTGAAGT

***EYK1*_*YALI0F01606g* uniprot|Q6C394 Erythrulose kinase**

ACTGTCTGAGCTCTAGACTTCATCAATGGCTACTCCAAATATCAAATTATCATGCTTCATTAAATATATAGGTTTTCGTATGTTTGTCCGTTTAGGCAGCAATGTGCTTCTTCTCGTAGGTCTCAATATCGGCAACCTTAGCGGCAGAAGCAGAGGTCTGGTCAAACTCGTAGGTGAGCCACTCGGCCACCAGACGTCGAGCAAGCTCGATTCCAACCACCCGCTGGCCCATGCAGAGAATCTGGGCGTTGTTGGAAAGAATGGATCGCTCGACGGAGAAGGAGTCATGTGCAGTCACGGCTCGAACACCGGCCACCTTGTTGGCGGAGATGGCGACACCAAGACCGGTACCACAGATGAGAATGGCTCGGTCGGCCTCGCCGGAGGCCACCTTCTCAGCAGCAGCAATGGCAATGTTGGGGTAGGCGGTCTTGTCTTCCGAGGCCTTGACACCAACGTCAATGACCTTGTCGACTCGAGGGGACTTTTCGAGATCGGCCTTGATTCTGTTCTTGTAATCAACGCCAGCCTCGTCGCATCCAACAACAATAGTGAATCCCATTTTGTGCAAGTGTGTGTGTGTGTGTGTGTGTGGTGTGTTTGTGTGTTAGAACGGATGTTCTGGTGAGTGTGAGTGTGTAGTTGTGTGATGAGACCTTGGTGCCACCCCAAGGTATATATATATAACACCTCCAGGAGCTCTAAAAAGGCATCTACTTTTCTCTATACTGTACGTTTCAATCTGGGGAAGCGGAATCCCAAAAGGGAAAGCCGCCGCATTAAGCTCCACAGCCTTGCATAATCCGATGACCTGACTAGTGCGGACAAAGACTATTATTTCGAGGCAAGGCCACCACGTACCGCGGTCCCAAACTTTTGCAAAGCTGAAAACAGCGTGGGGGTCAACGTGGATCAGAAAGAGGGGCAGATCAGCTTCTATAAGAAGCTCCTTTCCCCACAATTGGCCCACACGACACTTCTACACACTTACACATCTACT***ATGTCCACAAAACATCTGTTCAACGAGACTGACGAGCTCGTGCTCAAGTCTCTCGAGGGAGTTCAGGCTTCCCGATCAGCGTCCATTCTCTCCCACAGATTCAAGGTGCTCTACAACGGAACCCATTCCGCTGACCGAGTTGCAGTTCTTTCTGGAGGAGGCTCTGGCCACGAGCCTGCCCACGCCGGCTTTGTGGGAGACAACATGCTGACCGGTGCCATCTGTGGCCCCGTCTTCGCGTCTCCTTCAGCCAAGCAGGTCGAGGCCGGCTGCAAGCTCGTGCCCTCCGACAAGGGTCATATTCTGGTCGTCACCAACTACACCGGCGACATGTTGCATTTTGGTCTCGCGGCCGAGAAGCTCAAGTCTCAGGGCCACAAGGTCGGCATCATTAAGTCTGCCGACGATGTGGCTGTCGACCGAAAGAGCGGTGGTCTGGTCGGTCGACGAGGACTGGCTGGAACTGTGCTTCTGGACAAGATTGTCGGAGGAGCTGCCTGGGACAAGCTGTCCTTTGATGAATGCATGGCCATTGGAACCGAGGTGGCCGAGAACACCGCAACCGCCTCAATTGGACTGGACTACTGCCACGTTCCTGGTCGATCCGTTGAGAACCACGTCTCGCTCGACCAGAACGAGTGTCAATTCGGCCTGGGTATTCACAATGAGCCCGGAGTCAAGACCATCAACCCCGTGCCTGCCCCTGAGTCCATGGTTGATACTCTGCTCAAGTACCTAGTTTCGCAGGACGACCCCGAGCGATCCTTCGTAAAGTTCAAGGAGGGCGACGAGGTCATTCTCCTGGCCAACAACCTCGGTGGAATTTCCACCATTGAGATGCGGGCTGCTGTCCAGCTTGCCCGAGAGCAACTCGAGAAGACCCACAAGATCAAGTCTGTGCGAGTTCTGTGCGGCACCTTCATGAGCTCTCTCAACGCTCCCGGCTTCTCTATCACCCTGGTGAACCTGTCTAACGGCTCCCACAGCAAGAACGTGCTCAAGTACCTGGACGCTGTGTCCGACGCCCCTGCCTGGGTCAATGTGGCCCCTCCTACCTCGGTCAAGCCCTTTATCAACGAGGACAAGATCTTCGACGACGAGACCTCCAACATTAAGGCTCCCACACTGGACATTCCTGAACAGACCGTGGTTGCTGCTCTCACTCAGGCCTCCCAGAACATTATCAAGGCCGAGCCTCAGCTTACTGCATGGGATACCGAAATGGGAGACGGAGACTGTGGACACACCATTGAACATGGCTGCCGAGCTCTTCTCGAGTACCTCAACAAGAACAAGAGCGACCCAAAGGCTCTCGAGATCATCCCCATTGTGCGGGCTGTCGTTCACATCACCGAGGAGGATATGGGAGGCACCCTGGGAGCTATCTTCGGCATTTTTTTTGCCTCTTTCCTTAACGCTCTTCTGCTGGACCCTCTGTCCCATAAGACTGATGTCAATGTGACTGATAAGCTCGTCAACGCTGCTAACACCGGTCTGGAAAGTCTCATGAACCACACTCCTGCTCGACCTGGTGACCGAACTGTCATGGACGTGTTGATCCCCTACGTGCAGTCTCTGGTGTCCACCAAGGATATCAAGGAGGCCGCTCTCAAGGCCAAGCAGGCTGCCGAGGGCACCAAGAAGATCAAGCCTCGTCTTGGACGAGCAGTCTATGTTGGGGAGAAGGACGGTGAGCTTCCTCCCGACCCTGGAGCTTGGGCTGTCTACGAGCTGGTTGATGGTTTTGCCAACCACAAGTAGAGGGAGGAGAAGCGAAGGAATATGAGTACTTGTACGAGCACTTGTAAATGGCATATAATTTTTAATGATATTTATGATGGAATAT***AAATTTACTGTACTTGGAATTTTGTTATTACATTGAGTAAATGTTGACCCAGGTGCTACAATACTTGGTGTTCTGGTACAATACTCGTACATGTATCAACTAAACTAATTCCCAATATTACTGTACTTACAAACGGAGCAATCTTATCACCAGCCCGTTTCCTCAACATTCCACAAGTCTGTCCTCAAAGCAAGGTCAGATCAGACCCAAATCGGACCTCTCGCTTCGGTTTTCCTCTTCGTTCGTCTTCCTCCTTTTGCGTTTCCTTTCTCCCCAGAATCAACAGTTACCCCGCCACTCATCGATTGAGTTCGAAAAAGACAAGCAGCGAGCTCCAAAAGGTCTACACACGACAAGGCAGTCAATAGACCTAATGCTACACAAGTACGTACTTACAAGTGGTCCGCGGGGATATCTTAGAATGATGCCAAGTTCTTTGTACTAGATTGCCTTGTTATCCGTTTCTATTCTGCCGCCCATTGCTCCTGAAACTCACCAGCCGGATTAATCCATTCTGTATTACTCACTATGATCCGTGTGATCAAATATGGGCCTCGGGATGTAGTGAAATACGGTCCCAGAAGGCACAAAGCTACCCCCGCACATTTAGCTGCTCCCGTGACGCTCCAGTCTATCTCTACGCTCCCTTGTTCGCCCCGTGGTTGGATTTCCACACTGGTCTATGAAACCACCCCATGCGGCTTCCCGATTGGGACATCCGCTGTCTAACTCGTGGACTGTGGGGGGCCCTGAACTCTACTGCACCATGCATGAAACTGCATAAGGCTGCATGTTGGTACAGCGGAACAAGCACATAATGAACAATGCCACCAACATTTCTACATACACACACACCCACACTCACACCGTCTTCAGGCACCTAAACACTCACACAAAACAAAATGTCAAACACACGACAGCCCGTGGTGGCCATCTCGCTCAAAATGTACTTTGATCCGGCCAAGACGCTGCAGTTTGTCTCTGCCTTGGCTGGAATTGA

***HXM1*_*YALI0D25278g* uniprot|Q6C7U4 Heme-binding peroxidase |**

CTGCAGGGTGCCGAAAAGTTATCTCGATGATCAGATCAGATAAAGAGACAAGTGCGAGACAGAAAAAGTCAGACGGGTAAGTTGAACTTACCTGGGATTAGGTAATGAGGCGCATCTGCTGCGTCGGAAGTGTTGCTGGAAGTGGTAGTGTGTGTGAGGAGTGTCCAGAACGAGCTTCAGCCATTTCTGGCGACTATCAGGCATCTTATCCGAAAAAGTAAGTGAAGATACTCCATGAACTGTTGTCAGGTCAGAGACGAGTTTGGAGGGTGGAATAAACCTCTATGAAGTCATCAATGCAGTCATCCCGGAGATTGAATCTCTTTTCACATTCAAGAGTTGTCTGATATGAGTTCTGGTAGTGGACAGTCAGACATGACTTTATCAGTACAGTACTTCAATGGAGTGGCAGCATTGAAGTATTTTGGACTTCCAAGGACACCACAGATTGCTGCAATCGATTCGGGAGATTTGGCTGATTCTTTTGATATAATAATGTCCCTCATTGCCTCGACAATATATTGGACTTTGGTGGACCTTCCTCATTCGTAGAAAGTCCCTTCAATTCCAACTTTGAGCTTTGAGAACATTTTTCCTAGCAAAAGTAAATCAATCAACTCCCTTGATTCTGCTAAATCTAGTGATACAAAAATATCCACTGCTTGCAGTACAAAAATCTCGAGACCAGCCCATCTTCATCCGACTACCTACACCAACTGCATCGGCTCCATCGGCTCGATTCTTGGCGCCAAAAGAGTCCAAGAATTGCTTCAAACTTTTGAATTCACCGTTTCTCACCACATCAAACCGTCTTCTGTCGTCGGCTCCAGCCGTGTCCCTTCTTACCTCCCACCCTAGCCCCAGGTGCCCACCTTAGACGTCTACGGTAGGGTACTCACTTCTGGGACCTTCCATAACCGCCCAAAGACCAGCAGTTATTTGTAGACCACAAAAACGCCTCTAAATCAACTCCAAAACATTTCTCCGTCTCTTTTATGTCTCTTCTACGTCTCTTTTCGTCTCTTGGCAGAGTTCTGCTTCGACGAATACCTTCTGCATCTGCCCGTCGACTAAAGAAGTCACTGGACCCGCAACGCGCGACCGCTGCGCAACCAATCGCTAGAATAGAGCAAATAGATGACTACCTTGATCCGATCACGTGACAGGCAATTCTCCCCCCCCGATCTCGTGACTGACTAAGCACCCAGTGACAGTGACTGACTAAGCACCCAGTGAGCTACAGTACGAGCACCGGTCTTCACCAACCACCAACCACCAACCTGGTTCCAGACACCCCTCTCACCTCACGTCAACGTCGTACCCCGCGGAGACCCGGAGAATGTGCCACCCTGGAATCTGATAAAAAAGTGCGTCTAAGCTGCATCCCGAGGGATTTATCTAGACCATCTACAAGTCATATCTCGGAAAATACCGCCCGGAAAAACTCTGGAGGAGTTGCCTTAGCCTTGTCATGTGACACGGTCCATTCTGAACGCGATTTCAGTTATTTTTCATCACGTCCAAATTCTTCCTACTTTCTGGGTCACCTTGGCTTCTTTTTTATCAGATTAAAATAAACTTTTGTTGTGGCGCAAGTGAGTTTAACTTTATGGATTTAGAGTTAGAATTAACGTTCCGTCCATTCTAGGCGACCACCCTAGAATTTAAGACTAGGAAAAAAAAAAGAGCCGGTATTTTATAAGGGGATGTTTTCTCCCTTCTTTTCACTTGCTCCAACTTTGAACCGATCGTCGAAAATCGCAAATATCGAAAATATTTCGTCCTCGCAGCCCTAACCCCACTCGCAGCCCTAGCCCTCGGATTTTTGACTCAGTGCGCGCAGCCATAAAGCACAGAAGAGGATTGCCGCAGACAAGAAGGCAGTTTTTTGACCCCTCTCACTCAACAACCCTACACCACAGAATTCACATCGTCTAATTACCCGTGTAATCACCACGTCGTCACTACGTTCACTTCGCCACCACATTCAACACACTACC**ATGCCCAAACTCAGCCAAGACGACATCCTACCCCTGCCTTCCGACGTTGGAGCGCTGGCCAACCGAATCAACAAGGCCACGCGGGGCTCGCACAGCAAAATCAACAACTTGATCAACCTGAAAATCGTGTTTGCGCTGCGAGACGCGCGTATCTACCGACAGGGAATCCAGGCTTTCTACCACGTGTTCAAGACGTACGAGGAGGTGTGGCAGGAGGAGATGCAGCGTACTGACGAGTCCGGCGAGTACACCCGTATCGCCAAGATTCTGCAGCAGACGTGGAACCCGGCCATCACCCGAACCGGCCCTCTCACCACCGACCTGCTCTTCTACTACGGCTCTGAGGAGAAGTTCCGAGACCCCGTCATGCCTGAGCAGCGTGCGTTTGTTGAGCACATTCGAGAGGTGTGCCACGCCCAGCCTCACCTTTTGCTGGCGTACGGCCACGTCATGTACCTGGCTCTGTTTGCCGGCGGCCGGATTCTGCGGTCCAACGTGGCCCGAGCGGTGGGTCTGTTTCCCAAGGTGCCCGGCCAGAGCCAGGAGGAGGTGGCGGCCAAGGGCACCAACCTGTTCCGTTTCGAGGTAGACGACGAGGAGGCTCTGCGGCTTGAGTACAAGCGAAACTACGAGCTGGCGACCCGAAACGACCTGACTGAGGAAGAGAAGCAGGACATCATTGCCGAGTCACTGGACATTTTCAAGCGAAACACCGACTGCGTGTCGGAGATTAGCGCCAAAAACACCAAGGCTCTGGCCGGCAAATTTGGCTACAAGGCTGCCCAGGCTAGCTACAAAGTGGTGCTGGTCATGTTGGCTCTATTTGTGTTTTACTCGGTCTACTCGCGTCTTTTTTGA**GCGTGACGGTCCGAATCCGAGATGTACCAACCGACACACCAACCCATCCCGACCAGCCGAACCAACCACAGACCCACCAACCACCAATACCACTTCTGTAATACCACTAGCATATACTGACGAATAATATTGAGCATTTCTGACATTGTACTGACTACCCGTTCTCCTGATTCTGGCGTTAGGGCCATTCAATATAACAATATCTCTACGACTTGTAATACAATATCGTGTCATTTTTGTGACATAAATACACACCGAAAGATGATAAAAATGGTACCATTGGATGCAGCAGTCTTTGATGATTCTAATGGTACTATTTTCAATCTATTTTAGTACAATATTGTCGAGTTGGAACCACCATTTGACTTCCACCAATAGACATTCCAAGATGAGATAATCAGACATTCTCTGTGTGACAAGTGGTAAGGAAGAGTACACTAATGGACATTCCAAATGATTCTCATTTTAATGATGTAAAAAACCCCACGAGTTCTCCTTCATTGCGTTCAAATTGTGTTCTCTATTGAACAGTATGACAGATGTCTGAAAAGGTCATTTCTGAAATATTTTCGGGACAAATTGTCCTCTGGAGTTCACCAATACTTTCTTAATTCTGTATAGATTTGATCAATGTAGAAAAACATCCGTACAAACCAAACAATTTCGTGGAATAAAGCATTATACAAGACTGTTCCGTAGTGAGTGAACATTATGTTTATGATCTACCCATCAAATGATGGCCAAAGTTATATGGTCGATTTCACTGCGCCTTGACGATTCCAATGATATGATTAACTCATCCTCTTTACATATATTTGGAAAGACATGTTCAAAACTAGTTCCTTTGGATGTCCCTATAAACCCACCTCTCTGGGCGTCTTCAGGAGATGATGGGTATACAAAAAGGTGTATCGATATGATACTAGCCACAATCTCATTTGGATCTTATCGTAACATCCGTCATCTTTACTACAGTATGTTAGTTATCTGGCCGGTATTGTTTTGGCCGGTATTGTTTTTTCCTCAGAGAATCAAAACACTACAAGTACCATCTATTCCAGCCAATTTAGATGTCCAAAAGGCAACAAAAGAAAATCATTGAATCAAACGAGTCGAATATAAAAAAAATATCATTTTTCCACCACGTGACTTACAAATATACCATCTTTCTGGATTTATCTATTCTCTTATACCTACGGACTGTCGAAGTTTGAAGCCGATTTGAGCAGCAACTTCGACAGGGTTGGAAAGAAGATATCCGGTATGTAATAGGGCAGAAGTTGTCTAGGAGTACCAGTCAAGTCCCCTAATCTTTTCTGACTCAATCAGAGCACTTTTCAATGAGTTTGAGTAGATTTTTCTTACCACATACTCAAAGGATGGGGTATATTACGGCTCATTTTGAACCTCCGTCCAAATGATGTCAGAACAGTTGAAAGAAGAATATGGGGTCATATTTACCATCCAAAAATGCTCCTTTGGAGGATTATAACAGAGGGAGTTCTAGAAATTACAATACAATAAAATAAAAAAAAATTAAAAATTACAACTAAAAAATAAAAACAAAAACAAAACGCCAAAAGAACCCTGAAAGTAGCCACTGAAGAGAAATTCAAAGCCTCAGTCCTACCTCCTCATCACCTCGTATCACCTCGTATCACCAACCTGACATCTGCCATCCCTTTTAATCTCCTTCAATTACCCCTTAGCGCCATTCTTAGCCGACAATATTTTTGCTTTCATTTTCATTTTATGTTTAAAAATAACCAGTCACGTGACATTTTTGGCCAGACAAATCCAACCTTTCCACTTCGCAGTCGCAATCGGCGGTTTCTTGGTCTAGTTGGTTATGGCATCTGCTTAACACGCAGAACGTCGGCAGTTCGATCCTGCCAGAAATCACTCTTTTTTGCTCCCCTCCGAAGCACTCGACTTTGTGTCCTCCCCCCTCTTGCTATTTCTGGTATCCTCCGTATATAATTCCAGGGTTAGGGTTATAATAATTGTTGGGATTTTCGATTAGAGTCTAACAATGACTTAATACGGATAATGGGTTAGGTTTATGTTTTTTGGTAAGTTGCAGTTCTGGGTTAGGGGAATCTCTCAAATGGAGACAAGCTTAAAAATTCTTGCAGGTCACTGCATAATCGGTTA

***LEU2-302*_*YALI0C00407g* Deleted version of uniprot|P18120 3-isopropylmalate dehydrogenase**

TGTGTCTCGAGGCATGGAGGGACGACGGGTCGCAGCGGACGCGTCTGGAAGCATGACCAACGTGAATGGAGCCATGGAGGTGGCAGCTCTCAGTTGGGTGGATGGAACACTAATGGGGTGCACCGACGCCGGAGTCGTTTTCCGTGTTGACGAAAAAGATTACAGATAGACCAGACTGTACCGGCAAGATCTCGTTAAGACACGTCGACACCATATCATATAAAACTAACAATGCATTGAATTAATACGAAGACTACCCGTTGCTATCTCCACACCGTTATCTCCACGGTCCAAAGGCTGCTCAATGTGCTGCATACGTAACGTGGGGTGCAACCTTGAGCACATAGTACTTTCCGAAAACCGGCGATAATTAAGTGTGCACTCCAACTTTTCACACTGAGCATAAAATGTGGAGAAGAAATCACACTAAAAAGTCAGGTAGACTGGAAAAATGCGCCATGAAATAATATCTCTTGCTACAGTAATGCCCAGCATCGAGGGGTATTGTGTCACCAACACTATAGTGGCAGCTGAAGCGCTCGTGATTGTAGTATGAGTCTTTATTGGTGATGGGAAGAGTCCACTCAATATTCTCGTTACTGCCAAAACACCACGGTAATCGGCCAGACACCATGGATGTAGATCACCAAGCCTGTGAATGTTATTCGAGCTAAAATGCACATGGTTGGTGAAAGGAGTAGTTGCTGTCGAATTCCGTCGTCGCCTGAGTCATCATTTATTTACCAGTTGGCCACAAACCCTTGACGATCTCGTATGTCCCCTCCGACATACTCCCGGCCGGCTGGGGTACGTTCGATAGCGCTATCGGCATCGACAAGGTTTGGGTCCCTAGCCGATACCGCACTACCTGAGTCACAATCTTCGGAGGTTTAGTCTTCCACATAGCACGGGCAAAAGTGCGTATATATACAAGAGCGTTTGCCAGCCACAGATTTTCACTCCACACACCACATCACACATACAACCACACACATCCACA***atggaacccgaaactaagaagaccaagactgactccaagaagattgttcttctcggcggcgacttctgtggccccgaggtgattgccgaggccgtcaaggtgctcaagtctgttgctgaggcctccggcaccgagtttgtgttcgaggaccgactcattggaggagctgccattgagaaggagggcgagcccatcaccgacgctactctcgacatctgccgaaaggctgactctattatgctcggtgctgtcggaggcgctgccaacaccgtatggaccactcccgacggacgaaccgacgtgcgacccgagcagggtctcctcaagctgcgaaaggacctgaacctgtacgccaacctgcgaccctgccagctgctgtcgcccaagctcgccgatctctcccccatccgaaacgttgagggcaccgacttcatcattgtccgagagctcgtcggaggtatctactttggagagcgaaaggaggatgacggatctggcgtcgcttccgacaccgagacctactccgttcctgaggttgagcgaattgcccgaatggccgccttcctggcccttcagcacaacccccctcttcccgtgtggtctcttgacaaggccaacgtgctggcctcctctcgactttggcgaaagactgtcacccgagtcctcaaggacgagttcccccagctggagctcaaccaccagctgatcgactcggccgccatgatcctcatcaagcagccctccaagatgaatggtatcatcatcaccaccaacatgtttggcgatatcatctccgacgaggcctccgtcatccccggttctctgggtctgctgccctccgcctctctggcttctctgcccgacaccaacgaggcgttcggtctgtacgagccctgtcacggatctgcccccgatctcggcaagcagaaggtcaaccccattgccaccattctgtctgccgccatgatgctcaagttctctcttaacatgaagcccgccggtgacgctgttgaggctgccgtcaaggagtccgtcgaggctggtatcactaccgccgatatcggaggctcttcctccacctccgaggtcggagactttgttgccaacaaggtcaaggagctgctcaagaaggag***taagtcgtttctacgacgcattgatggaaggagcaaactgacgcgcctgcgggttggtctaccggcagggtccgctagtgtataagactctataaaaagggcccagccctgctaatgaaatgatgatttataatttaccggtgtagcaaccttgactagaagaagcagattgggtgtgtttgtagtggaggacagtggtacgttttggaaacagtcttcttgaaagtgtcttgtctacagtatattcactcataacctcaatagccaagggtgtagtcggtttattaaaggaagggagttgtggctgatgtggatagatatctttaaagctggcgactgcacccaacgagtgtggtggtagcttgttactgtatattcggtaagatatattttgtggggtttttagtggtgtttggtaggttagtgtctggtatatgagttgtaggcatgacaatttggaaaggggtggactttgggaatattgtgggatttcaataccttagtttgtacagggtaattgttacaaatgatacaaagaactgtatttcttttcatttgttttaattggttgtatatcaagtccgttagacgagctcagtgccatggcttttggcactgtatttcatttttagaggtacactacatccagtgaggtatggtaaggttgagggcataatgaaggcaccttgtactgacagtcacagacctctcaccgagaattttatgagatatactcgggttcattttaggctccgattcgattcaaattattactgtcgaaatcggttgagcatccgttgatttccgaacagatctcggcagtctctcggatgtagaattaggtttccttgaggcgagatgagacggtaagttggaggggtttgagaagagatagagatcggtttgtgtgacatgaattcttcaaaacacgattcataactgactggcactttctctcatccaatcaactgaaccattcccactctataagaagatcta

***LIP2*_*YALI0A20350g* Uniprot|Q9P8F7 Triacylglycerol lipase**

AAACTTCTCCGAGTCTGTGCCTTCAGGTGGGCATAGTTGATGGGTGTTTTGAAGTTAATAGTGGGGAAGAACTATGGCAAACAAGCAGATGCAGGCACCTTGTAACTGCAGACCGGTTCTTGTCTACCGACTCCGCTGCACCTGTGCCGCGGTACATGTCGTCACAGGCTGCGGGGTTCGGAGGCCCCCTTGCAACCTCCTTTGATAGTTGCTATGGCCCCAAAGAGTTATACGAGATAGACCCACAGATCTACTTGACTGTTGTCACAGAACCTGCTAGGTTTGCTTATTGTACCCGCTTTGTAGCTACTGTACAACGACAACGTCAAAAATTGAGACGCGAACAAACTCCAGATGCAGAACCCAAACCTCTCTCTCAGAGTTTCGAGTGCTTCTACCTCACAGTAAAGTGGAGGTGGACCTGCAAGGGAATTCAGTCACAAGGCCCCGAATGTCTCCGAAACTCCAATCGGACCGTTTAAACAGACTAATATCACGTCATTGATTGATATTAGCATCCGGCAAGAGCCGCAAGGTTATCTCCTCACCAATGAGCCTGTTGTACGGCTCATTCCGCATCTGCGGCTGATTCAGTTTCGAGTGGGGATGGTAGACTTCATTGCAGCATTCCTAACCTTCTACTTGGTCCGTGGAGATGTCATGGACATCGATTTTGGGCTGAGAAGCCTTTTGACGATGTTGATATCACTGACCGCTAATTTACTCTGGCAGTTTCTCCGGCTCTCGAGGCATCGTCGATCACCAAACACTATCTGCTAGTCTAAATGTCCGACACGACAGCTTTTGATCGCCGTGAACGGCGCAGACCTCATGCACCATGCACCAGGGCCAAATCAATTACGGGTCGCTTAGCGTTGCAGTCGGGGCATTATGGTGGAAGTTCCGATACGGCACAGACACATTCCATAGTGGGGGGATTGGATTATAAAAGGGCCATAGAAAGCCCTCAATTGATACCCAAGTACCAGCTCTCCTCACT***ATGAAGCTTTCCACCATCCTCTTCACAGCCTGCGCTACCCTGGCTGCCGCCCTCCCTTCCCCCATCACTCCTTCTGAGGCCGCAGTTCTCCAGAAGCGAGTGTACACCTCTACCGAGACCTCTCACATTGACCAGGAGTCCTACAACTTCTTTGAGAAGTACGCCCGACTCGCAAACATTGGATATTGTGTTGGTCCCGGCACTAAGATCTTCAAGCCCTTCAACTGTGGCCTGCAATGTGCCCACTTCCCCAACGTTGAGCTCATCGAGGAGTTCCACGACCCCCGTCTCATCTTTGATGTTTCTGGTTACCTCGCTGTTGATCATGCCTCCAAGCAGATCTACCTTGTTATTCGAGGAACCCACTCTCTGGAGGACGTCATAACCGACATCCGAATCATGCAGGCTCCTCTGACGAACTTTGATCTTGCTGCTAACATCTCTTCTACTGCTACTTGTGATGACTGTCTTGTCCACAATGGCTTCATCCAGTCCTACAACAACACCTACAATCAGATCGGCCCCAAGCTCGACTCTGTGATTGAGCAGTATCCCGACTACCAGATTGCTGTCACCGGTCACTCTCTCGGAGGAGCTGCAGCCCTTCTGTTCGGAATCAACCTCAAGGTTAACGGCCACGATCCCCTCGTTGTTACTCTTGGTCAGCCCATTGTCGGTAACGCTGGCTTTGCTAACTGGGTCGATAAACTCTTCTTTGGCCAGGAGAACCCCGATGTCTCCAAGGTGTCCAAAGACCGAAAGCTCTACCGAATCACCCACCGAGGAGATATCGTCCCTCAAGTGCCCTTCTGGGACGGTTACCAGCACTGCTCTGGTGAGGTCTTTATTGACTGGCCCCTGATCCACCCTCCTCTCTCCAACGTTGTCATGTGCCAGGGCCAGAGCAATAAACAGTGCTCTGCCGGTAACACTCTGCTCCAGCAGGTCAATGTGATTGGAAACCATCTGCAGTACTTCGTCACCGAGGGTGTCTGTGGTATCTAA***GCTATTTATCACTCTTTACAACTTCTACCTCAACTATCTACTTTAATAAATGAATATCGTTTATTCTCTATGATTACTGTATATGCGTTCCTCTAAGACAAATCGAAACCAGCATGCGATCGAATGGCATACAAAAGTTTCTTCCGAAGTTGATCAATGTCCTGATAGTCAGGCAGCTTGAGAAGATTGACACAGGTGGAGGCCGTAGGGAACCGATCAACCTGTCTACCAGCGTTACGAATGGCAAATGACGGGTTCAAAGCCTTGAATCCTTGCAATGGTGCCTTGGATACTGATGTCACAAACTTAAGAAGCAGCCGCTTGTCCTCTTCCTCGAAACTCTCAAACACAGTCCAGAAGTCCTTTATAGTTTGATCTGTATCCAGATAGCCTCCGTAATTGGTGTGTGTCTTCAAATCCCAGACGTCCACATTGGCATGTCCTCCACTGATAAGCATTTGAAGTTCATCTGCGTTGAACATTGAGACCCACGAAGGGTCAATGAGCTGGTATAGACCGCCCAAGAATGCATCTGTCTGTGTTCTGATACTGGTGTTAAGCTTGAAGTTGGCCACTTCATAAATATATCGAAGATAGTTGGCCTTAGTGACAGGTACTTCGCTTCCGTTTCGAATCAGATCACGTGTTCGAACATTGCCTTCGGAGTCAGCGTAATCGATTGAAAATGTAAGACCAAGATCGGCATCTCCCTGAGTGGCGTAAATCTGTTTCAGCGATGCAAGACTCTCGTAGAGGTTGGGGTCCAGAGAATACAGATCGTCAATCGACGACCGCATACTTCCTTGTGTCCACTTTTGAAGGAAGAACGATGCAAAGCCGTGCTCAATAAGAATGTTCTCGTAAAGGCCCTTTCCCACCAGATTTCCCAGGAATGCAAGTTGTTTAGTGTCATGGGTAGTCGGGTTGGGGTAAAGAAGGTGGTTATCGGTAGCGGCAAAAAGTCCTCGAGAAGTGTTGAATGCATCATCTGTGACAGAAGT

***LIP7*_*YALI0D19184g* uniprot|Q6C8J2 Triacylglycerol lipase**

CGTGAAATGTGACGTGAAATGTTACCAAAATGGGAGTTTCGTGGCGGATTCTGTCCGTCTCATTTACACTAATCTTTTTTTTTTTTTTTTTTTACTCTAGCGACACTTTTCCGGACATGCCCGAGATTGCTCATCGTAGTATGAACGATGAATGATAAGTGCTACCTGACCGATAACCCGCTTTGATTGGGTCTATAAATCAACGTCAGCTACAAGTAGCGTGTCCGCCAAGTTGACTATAGGTGCGGGGGGGAAAGTGAGAAACTAGTGTCACGAAATGAATCACGTGAATGAGGAGATTATGACAACGTGTAGGTGGATATGAATGGATCCAATATACCCTTTTTCATCTGATAGGCTCCCTCGTATACCTGATGCCAAGAAAGTGTATCTTCTCCGAATACTTGGCAAGTTGATTAGATAGCACAGAGAAAAACTCGTGCGTGATAGTGCTGATATCTGTAATAGGGGCTACTTGACTAGTTATGAAACGTACTAGACGTGTACTTTTAGCTGTACTGACGGTGCTACTTAACTTGTGGTGGACTGTAGTGGGAGAGCAGCAGCCTTAGCTACTATGATGTGTTGATCAACTATGGAGGTGGAGAACATGTGATGCAAGGAAGAAATGGAGCAAGTCCATTGTAATATACTGTCATATAATGAACATTTTCCATCGTTAATGGTGAAGTCCACATGGGTCTAAACGGCTCTGTACACTAGATCTAGGACACCTACTTGTAGTACACAGGTAAAACACCAGCACCAACTTCATGACACAGTTGGTCTAGACATGATACAGGGGACGACGACTAATCATCGCCAAGACATTCTAATCTCTAGTGATTAGGACATCTACTATAATAATCAAACTAAACTAGCCAGCTTCTTTAGTTTTCCCTTCCAGGTATACAAACATGCTGGGCCAAAGAGGTGGCTGCCAGTCTATATATGAAACAATAGCCCATCTGGCTCCACCTCAATCAACGTCGACACTACC***ATGGTCAGCTTTGGAGCTCGAATCAAGGACTTCTTTTCGGTACTCCTGTTTGGAGCTGCCTCCACCTCTTCTTCCACCAAGACCGCTCTTGTTTCGCAGGGCTTCTACGATGCTGCTCTGGACTTTTCCCATCTGTCCAACATTGCGTACTGTGTGAATGCCCCCATCACTCCGTTAAAGAGCGACTTCTCCTGCGGCCAGTCATGTGTACATTTCCCGGATATTGAGCTGGTCCACATCTTTGGAGGCGACTTCTTCTCCACATCTATCACCGGATACCTTGCTCTGGACCACGTCAAGAAGGAGAAGTATGTGGTCTTCCGAGGTACCTTCTCCATTGCCGATGCTATCACCGACATCCAGTTCCAGCAGTCCTCCTTTCTGGTAAATGTTCCCGCTCTCAACACCTTCATCGCCAACGATACAGCTCCAGAGGCCCAGATCGATTGCAAACAGTGCAAGATCCATGACGGCTTCTCCAAGGCTTTCACCGAGACCTGGCACAACATCGGAGACCTGCTGGAGCAGCATCTCGACTCGTATCCAGACTACCAACTGTACGTGACGGGACACTCTCTGGGAGCCGCAATGGCGTTGTTGGGCGCCACCTCCATTAAACTGAGAGGCTACGACCCCATCCTGATCAACTACGGACAGCCCCGAGTTGGAAACAAGGCGTTTGCAGACTACATCTCCGCGCTGTGGTTTGGTAATGGGGACGGCCTGGAAATCAACCAGCAGCGAAGATTGTATCGAATGACCCACTGGAACGACGTGTTTGTGGGCCTGCCCAACTGGGACGGATACACTCACTCCAATGGAGAAGTGTACATCAAGGGCAAGTACGTCAACCCTCCTCTGAAGGACGTCTTTTCTTGTGCAGGAGGAGAAAACTCCAAGTGCTACCGATCGGAATTCAACCTGCTCGCACAAATCAATCTTTTGCAGAACCATCTCTGCTACATTGATTACATTGGTTTCTGTGCTCTGAACGTCGGACGACGAGAACTCAACGACTTGCCCCATTACAATGGTCCGTACAAGTATGGACACAAAACCGAGGAGCAGTTTATCGCCGAGGGTCTCGAGCTCTCCAACTAA***TTCTCAGATAGCCGAATGCACACCTGTATTTGTTCTCTGCTGTGTTAGTACACTGTAGAGTAGACTTGCTGTAATAGCCGCCCTCTACGATTCACTCACAACCTCACTCCGTCTGGCTGTTCAGTCTTTTCAGTAATATATTGACTGTCTGTTATACAATCCCATAGGCTGGCCACTCAATTAAGTAACCTCACCATTCGCTCACTAAGCTTATCGTTTAGAAAACATAAGGGATGAAGATCCAAGGGACCTGTCGCTTGAACTCCTGGTAGTCCTCACCGTACTTTCGCTCCAGTCGCTCAAAGTCTCGGTAAGCTCGGTGGATGAGCACCAGGAAGAAGAAGACCGGGTAGAAGTAAGGCAGGGGAGAAGCAACACCGCACATGAGAGCCCAGGTGAGGCACATGATGAAATCAGCGGTGTAGTTAGGCTTTCGGCACCAGCCGTAGACACCGGAGGTGAGAAGAGTAGAACCGTTCTTGCACTTGATGAAAGTAGGGTTCTTGATGGTTTGCCAGGGCAGCTGGGGGAAGGTGTTTCGCTTGATCATGGTGCCCAGTCGCTGCTGTCGGAATCGGTTCTTCTGCGAGTTGGCAATGTCGAAGAAGTAGTACGACACGGTGATGGTCACAAACAGGAACACGTTGTAGGCAGTGGACCACTCGTAGTCCTCAGGCTTGTGGTTAATGAGGAAGAGGGTGCAGTGGGCGTAGGTGAAGGGGACACCGGCCATGTTCCAGAAAATGAGCATGAAGCCAAACTTCTCAAAGAACATGTCCCAGGTGGTGATGATGAGCTCCTCTCCCTTGGAGCAGGCGTTGGCGTACAGCCAGTGGGCGTACAGCACGAACATGACCTGAGGGGTCACGTAGCCGTAGGTCTCGTACTGCTTGACAGCGGCAGACAGAGAGGTGAAGAAGAGGATGAACCAAGGAAGTCGCACCTCGAAGAACATCTTCCAGTCGATGATGCCGGTTCGGGGGTTGAGGTTGGCGCCCAT

***LIP8*_*YALI0B09361g* uniprot|Q872L3 Triacylglycerol lipase**

ATGCCACAAGGCCAATGGGGGTTTCGACATGTGTCAGACGGCGGAGATCCACACTAGCTACTTGTAGTTAACCCATGGAAAGTGCATCTTTAGCCGGAGACGCAAGACGGCACATTCATGCACAACTACACACTACAAACACACCGTACAAGTGCGGACCCGGGCTCGAGTACAAGAACTCAGTCATGCAAACACCATCTGCCTTTATTCTCCGACAAGGCTCCGATCATAAATGCAATTTATGCATCCACATACACACGTACACCTGACGCCGCTGTGTAAACGCGTGTGATCGCGAGCGAGTAACGTCCACCAGTCTTCTGGGAGCCCCTTTCCTCCAAAAGGCCTGACATTGACGCTTTAAAAAAGTTGACATCTGAAACAAGCAGCCGTTGCCGGGGGTCTCATTGGTATAAGACAGGATACCGTTGATTCACCGGTCATGGTTCACGCTAGTTTGCAACCCCCCCCCCGCAGAGATGCAACCTCCACCTAAGGAATATCAAGACAAAAGACTCAAGCACAAGTTGAAGCATGGCACAAGCTCCAGCCCACATGCCAAGGTTCACAGGTGGATATATTGACTGGACCTACATTCTTTGTCTGCGTGACAGTTTCGAGAATGTGAAGATACCCAAAGTGCGGTGATTATGATGCTGGCAGGGCCTCCCAGGGTCTGTTTCAAATCGCTACAACCACATGGCTGGATTATCTACTCATTGCAGATCAGGAACACTTTCTGTTGGCTCCCGCGTGCAGATATTATCATCTAACTAGTAGCTAAAGTCGCGCTAGCGCCTCTCTAGCACAGTCATGCACGTTTAGATCTGTTCGGGTCATGTCAGGTATACCTGTTTATTGGTATATTGAGGGGATTACCAGTTGAACAAGCATGACGGCTGTGGCGGTAGATACACAAAGAGAACGACTTCTATAAGAGGGACTATTCTTGCCCTCTGGGTCATCATCAAGCAGCAGCTTTCCACCCTTCTCTCTCCCA***ATGGTATCCCTCTCTGCTCGAATCAAAGACTTTTTTTCGGTCCTCCTCCTCGGAGCTGCAACCATCACTCCCTCCACACAGACCGCAGGCGTGTCTCAAGGGTTCTATGATTTTGCTCGGGACTTTGCCCATCTGTCCAACATTGCCTACTGTGTCAATGCTCCCATCACTCCACTGAACCCGGACTTCACCTGTGGCAACTCGTGCAAGCACTTTCCGGAAATTGAGCTTGTGAAGACATTTGGAGGCAACTTCTTCAAGACCTCCATTACGGGCTACCTGGCTGTCGATCATGTCAAGAAGGAGAAGTACGTTGTCTTCCGAGGAACCTTTTCGCTGGCAGACGCGATCACGGACATGCAGTTCCAGCTGTCTCCTTTCCTGGTCGATGTGCCTGCCCTGAACACTTTCTCAGCTAATGACACCACCGCAGAGGCCCAGACGCACTGTGAGGGCTGCAAAATTCACGACGGCTTCTCCAAGGCCTTTACCGAGACCTGGGGTAACATTGGTGAGGATCTGCAGAAACACCTGGACGCTAACCCGGACTACCAGCTGTACGTGACTGGCCATTCTCTGGGAGCTGCTATGGCCCTTCTTGGAGCTACTTCCATCAAGCTCAAGGGCTACGATCCCATTCTCATCAACTACGGACAGCCCCGAGTCGGAAACAAGCCCTTCGCTGAGTTCATTAACAAGTTGTGGTTTGGAGAAGGCAACGGTCTGGAAATCACCCCCGAGAGAAAGCTGTACCGAATGACCCACTGGAACGACATCTTTGTTGGCCTGCCCAACTGGGAGGGATACACCCACTCTAACGGTGAAGTATACATCAACAACCGGTTCATCAACCCTCCTCTCAAGGATGTCATCTCTTGTGCTGGAGGCGAAAACTCGAAGTGCTACCGATCCTCGTTCAGCCTGCTGTCCCAGATCAATCTGCTCCAAAACCACCTGGCTTACATTGATTACATTGGATACTGCGCTCTGAACATTGGTCGACGAGAGCTTGCCGATCAGGAACATTACACTGGTCCTTATTACTATGGTCATCGATCTGAGGAGGACTTTAAGAAGTTGGGCTTGGAGCTATCCACCCCACAAGTTGAGAACTGA***ACGAGTTGACATGCCTGCACTACTCAACAACTAACTACTTGTAGTCGTCACTTTACTATTATCTAGCTGTAATTGTATATTAATATATCTAACGAATATAACAGACGGCTATAGAGTACAACCTTCATCATACAACTCATGACTGAGTTCATTTCCCGACTAATGAGACTGACAAATGTTGGGCTTGGAGGGTTGTTGGGCTTGGAGGACTGTTGGGATTGGAGGACTGTTGGGCTCGAAGAGGTTGATGTGTTTTCTCCTCACGAGAAGTCGAGATATTATTCCACCTCGAGTTATGCCTCCAGGGCAGACTGTAATATCAGAAGCTATCCATACTATAGATGTCATGTTAGTCTAGCAGGCAAAATAAGTACAAATTCCGATTCAGAAAACTGGGAGCTTCTGAATGCTACCAAAAATGTCAACATTTCCACCCAAAACTACCCAGTTTGAGAACGTATCTTGAAAACTGGCCGAATAGTTGGGATGCACCATGTAATTTTTTTTTCTTTTCAGTTGACATGTTAGTTGGGAGCGATTGCACCTTCCAACAACACACTACAGAAGCCATCATTGGTATATAGTATAGAGTAAAACACGTGACCATCTAGCACTCCTACAGTCTCTTGTAATTGCGTGACTACTTGTACCAAATTTCTTCCACATGTCTGAATCTTGTACTTGTAGAGTCAGTCCACTTTGGAGGTTCCATCCATCTGTCGTCGTTACTGGGGCAACCTCCTAACCCTACGTCCGCATTTGTCTCCCAACAAACTCAGGGTTATGAAGGTGGACTTTTGAGGGCGTTATTTTCACGTGACTGAACGTGTTTTAATGGGGCAGAAAGGGGCTAGATGAGACACCCGGATCAATGTTACTGGGCAACATATGTCCTCAATTTGATCAGCCAATCATTTTGCACCACGTAGCCATTAGTTTCTGCTGTTCATTTCGCTTGTCGTATTTCACCCGCAGTTCCAAGTTAACCTCTGCGTTTAGT

***LYS5*_*YALI0E09306g* uniprot|Q6C6I2 L-aminoadipate-semialdehyde dehydrogenase**

CGCAACAGGTGCAGCCGGTCTACAACCCCATTCTCGACCAGGACTTCAACATGAACTACATGGTTCAGGAACCCATCACCACGGATTACTTAGGTGGAAATGTGAGTATTGACACAAGGATCGCCACGGACGCCTGTCTGATACGAGCGGCCTATTACAGGAACGTGCATTGATGATACGAGCAAGTGTACGTGAATCGACCGATGCACAGCCATAAGGAGCCACTTCTGCAACTACTGGCTCAGCTACTTATGCTGCTACTACTAATTAACTGGGACTGCTTCCGCTAACCAAGTGATTTTTTTATGGTGGCGGCCTAGTAGCGTGATTAGTAGTGCGGTTGTCTAGTACAGTGCAGGTGGAAGTGCGGAAGTTGCACATGTAAGTGCAAGTGGACTTGAAGGGGGTGTTTTTTTTAGTGCCTTGGCTTGTTTTTGCGACCGCCTCATTGCCAGACTCACATACACACACGCATTGCTCTGGGTGTTGGAACGGTTCTTGCCACCCAATTGCGCCATGAAGGTGTAAATGGGTATGGGCAGATGACTCAGGGTTTTTCTGTCTTACAGCTGAAGTTTACCCCCCCACCCCAACGCGTGCGTGTGATATTTTTTGTGATATCTCTCCCCAGGGTTGGCCTTACAATTTCAATCCGCCCCTCGCCCCCACTTCCACAGTGTGTCTTTCACACGCACCGAGCTTTGTCTGTTTTTTTTTTTGTTTTTCTCTCCAACTGCCAACATCTGTCTTACCATCGTTGTTGTTTGCATGCGTGGTTGGTGTTTTTTTGGTTTTGATTTTGCATTTTTCGTTTTCATCAAGGACATAAATGTTCACCTCGTGTGCCAAAGTACACTTTTCACATAACGATGGTGACTGCCAGACTTGTAGCGACGACATGGCCAATATTCTGTGGCGATGGGGGTTGTGCTCTGCGTTTCTCCTGCTCTCCTCGGAGTTTTGTTCCTGATGTACGTCCACACACCTTCAGCCTTCAATACTAACACAGCTTTTTGATTGGCAAAACTCCAAGCAATCCGTCTATTTGTTTCTGCTGGACGTGCGGCCCATCTGGAACTCCCAGAACGACTTCAACCAGGCC***ATGCGACTGCTTCCTGTCGAATCTCAGCTCGACATTTCGCGTTTTCGGTACAGAAGCGATGCGAAGATGGCTCTCGGCTCTCAGCTGCTCCAGCGGTATATTGCCACCGTTCTGACAGGCAAGAAGTGGACGGACATTGTCATTTCGAAGACTCCGCAGGGCAAGTCATTTGTGGCCAACTCGCCGTTCGACTACAACATCAGTCACCACAGCGAGCTGGTGGTTGTGGCTGTTCGTCCTGATGGCAAGCAGATTGGAGTGGATATCACCTCGACTGTTCCTCCCTCAAACTGGACTATGAACTGGATGGAGGGCTTTTCACAGATTTTCTCGCCGTTCGAGTACTCTCAGGTCACCAGCGACAGCACCGGCAATGGCGAGTTCTTCTTGCGGTGGGCACTCAAGGAGTCGTATTCCAAGGCCATTGGCATGGGGCTCAACATGGACCTTGCCAAGCTAGAGTTCAGAAACCTGGACACGGCCAGACTGATGGACGCGGCCAAGGACAAGACCGGAACCGACGTTGTGGGCGCCGTGGCTGTCCAGAGAGGCTGGAGCAACTCTGCGCAGCTGTGGATCGATGGAGTCGCACAGGACAGATGGCACCACGAGATTTTCATGCTCAACAACAATCATGTGATCGCTCTGGCGACACACAAGGAGGGTGTGAATGAGGTGGAGCAGGTGCGACTGAGAAATTTAACGGTGGAGGAGTTGATGAGCAGAGCGTTGCCTTTTGGACCGGCTGTGGCCATGCAGCCTCATTCCAACCCGGTCTAA***TTTGCACGTCTAGAATTTGAACCTATCGGCAGCACATAAACACACGTGCACACACACACACACACACACACACACACACACACACATACTCAGCCAGACTTGCGCGACGTCGTACACAGCTGGAGGCCAAGTCCTCACAACACACGGTCTGCATCAACTGAGTCCGCTCTGAAGAGTGGAACATCATCCGTACTGTAGGAGCACGGTTCATGCCTCTGCAATGTAGATAGATACATATAATTGAACAGCATGTAATATACACTATTGGAAGCAGTGGATGAATAAAACCTATGTAGCGACGGTATGGTAATGGTAATGGCACACCCACCAGGTGTCTTCAAGTCTGCTTATTTGTGCTGGCGTTGGTGCTCTCTCGGAAGTAGCCTCGTTCACCCATGTCAGTCATCTCGAGAGGAAAGTACTGAACGCAACTGGCGATAATCGAGCGTGAAAAGAATAATCAAGGGGCGGAAGGGTTTAAATAACAGTATGGTCGTCTTCATGGCAGTATTTGGCGGTGGTGAGCTGCTGGGCATATGTCTGTAGAAGTGCATGTTGGTGTTCGTGCCCCGTCAGTATGGAAACTGAGCTGTTTTTGTGACCGCCTGAGATGGTGGACACGACTCTGTACCCCCATTCTTTCACATTCTCAAGTCCACGAGCCATCGCAACAAGCGCCAAGTATACCAGCGTGATGCTTCCGCTGGTGTCCTCTAGTGTGTATATACTCACCTGAACAACGCTACGATTGTCACTGTTAGTCGATACCGGTGTTGCTCGAATTTCAGTCAAGTGTCTCGTAGTAGTTCTCAAGTCTTGGTCGATAAGTTGATGGCGTATTTGTGGTTGTGCCGTTCTTCTGTAGAGCGTCTGCGAGAGTATCGAAGAAGTCGAATAACTCGAGTGAGAGACTGCCCATCTGCTAGGGTCAGTTCGGTGATTAGAAGCGGCAGTGATGACGATGTCGTATTTGAAATTTCAGCAATGGTGAACATGTCGTACCAGAAATTTCTGGCCTTGACATGGCTTGCAAGTGTAGTTGCTGATGATAATAGAAATTAAAGATGTCCATGGGTGGAGGAGGCATAAAAAAGGGTAGC

***MHY1*-*YALI0B21582g,* uniprot|** ***Q9Y791* C2H2-type zinc finger protein Mhy1p required for dimorphic transition**

TATTATGTCGTCGAAAAAGGAAGTCGGTTTTGAGTCTTGGGAGTGGCAGCCGAATTAGATTGGTACAGTAGAGCCGAGTCCGGGGAGTGGCAGGTGTCAGCGAAAGCTCAAAGGACGAGAGGGGACCCCTGAGCAGACGGGCGGCTAGGTCTCGACAGATGAGGTGCGCTTCTCTCGTCTCGGTAACCCTGTCAGGACGTCCAGACACTCTTGCCAGCTTGCACCACCTCCCTTCGTGGTTTATGACGAAACACGCTTAGCTAAAGTTCTAAAGGCTAATATTACGAACTCTGTGAAAAGGCGAAAAACCACAAAAGGGACGTGTGGTGTTGAAAAGGTGAAAAAGAGAAAACGAAAAGTCTGGCCGAAGTCAATGGTGCCAAACCCAGAGAAAACTCTATCCAAACTCTGTCCAAACTCTGTTGCTCATGTCTGTCTCACTATCAGTCGTAAACGTAAGCGGGTGTTACGGTTAGCACAGCTTCATGGGACAAGTACAAAAGCACCACATATCCCTCTCTCCAGCTTTTTTTTCTGGTAGGCAAAAACTATCTTGGGGTCCGACCAGCTTCCTCACCCTCACCCTCACACTCACCAGCACTCCCCCCTTCAACCGCTCCACCAACTACCCTTTCTAACCACGCTCTTTTACTAAACACACACATCTCTGGCTGCGCCAAAAAGTGTCCACTCTTCCCTCCACTCTTATTCCTTTCCAGTCACTCCTTTGCCTGTTATTTTTGTTGATACCCCTTCGAGTCATTCAACATCTTTCCCAACCACTTCTTTCAACCGTCCCACACCCCTACCACGCTTTCCCCACGACCACCACAACTTGTCACCACTAACTTTGGCCCATTCATTAAACTCTTGTCGGCCGTTATAATACTTCTTTGTGTGTCGCATCGCATCTAATCAGGAAAACCCAAACCCGGATTAGCCAATTTCGCCAAAACCATCCCAATCGAAAAACAAAAAGTCATAGTACATTATCGCCAAA**ATGGACCTCGAATTGGAAATTCCCGTCTTGCATTCCATGGACTCGCACCACCAGGTGGTGGACTCCCACAGACTGGCACAGCAACAGTTCCAGTACCAGCAGATCCACATGCTGCAGCAGACGCTGTCACAGCAGTACCCCCACACCCCATCCACCACACCCCCCATTTACATGCTGTCGCCTGCGGACTACGAGAAGGACGCCGTTTCCATCTCACCGGTAATGCTGTGGCCCCCCTCGGCCCACTCCCAGGCCTCTTACCATTACGAGATGCCCTCCGTTATCTCGCCATCTCCTTCTCCCACTAGATCCTTCTGTAATCCGAGAGAGCTGGAGGTTCAGGACGAGCTCGAGCAGCTTGAACAGCAGCCCGCCGCTCTCTCCGTCGAACATCTGTTTGACATTGAGAACTCATCGATCGAGTATGCACACGACGAGCTGCATGACACCTCTTCGTGCTCCGACTCGCAGTCGAGCTTTTCCCCTCAGCAGTCCCCTGCCTCCCCGGCCTCCACTTACTCGCCTCTCGAGGACGAGTTTCTCAACTTGGCTGGATCCGAGTTGAAGAGCGAGCCCAGCGCGGACGACGAGAAGGATGATGTGGACACGGAGCTTCCCCAGCAGCCCGAGATCATCATCCCTGTGTCGTGCCGAGGCCGAAAGCCGTCCATCGACGACTCCAAAAAGACTTTTGTCTGCACCCACTGCCAGCGTCGGTTCCGGCGCCAGGAGCATCTCAAGCGACATTTCCGATCCCTACACACTCGAGAGAAGCCTTTCAACTGCGACACGTGCGGCAAGAAGTTTTCTCGGTCGGACAATCTCGCCCAGCATATGCGTACGCATCCTCGGGACTAG**AGGTAGAGCGCCTTCTAGTCTCCGCTCCATTTTTTTATTGTAACCAGTTAATAGAGAGTTTTTGAATGAATGTTTTAATTTAATGTCTGCTTTGAGAGTGTCTATTCCTTGTATTCCGTCCTAAGTATGTCGCCTTGTTCTCAGTAAACCAAATCTACGTTAGCCATACCTGACATCGGCACGATCCCTTCAGATCGACATGCCAAAATTCCGGATAAGGACTTTCTGATTGCGTGACAGAGTTTCGAATCTGGCTGTGGATCGGCGCAGCTGGGGAAACGACTTTTAGTTATACGCAACACACGGCACTGTTGGTGACGAGTGGTTAACCTGTTCTAGGATGAGTACTTTCCGGTACAAGTAGTGGAAGAGAAATTGAGGGTAAAAAAAGAGACGTAGAAGCCAATGATGCAGCATCTTCATACACACTAAATCTCCTGCAGTCGCTTGTCCACTTTGTAAGCTAGTCGCTTGTACCTACCTGGGACAGGTGTACTGTACACCGTGCTATTACTCAGCTCCAATTGGATACCGAATGTTTCCCGCGCCCAGATACGGCAGCTAAATCTTACGTCTCTTATTGTGACTGTCTGGAGAAATACCCCCGGCAGTGTGTGTGTATGCGGTCTCCAAGACCTAAAAGTTAAAGTGGGTATGCCAACCTTAGAGCAGCCCCGAAATACATACATGAGGTTTCGTACTCGCCTAGTGAAACACAAAAACGACGCTTGAAACCGATGGCTGCCTATGGGAGAGAGACAGAGCTAAGCCCGGACCCCGGACTTTCTGCCTGGTTTGGCAGTGTAGATTCACGTATGTCCAGTCTAGATGGTCGCCTGTCGAGCCCGTCACGCCATGCCGCCTATTTTCTTTTTCCCTTCCAGAATTTGACTAAGGATTAACACGTCGATGTCTCACAATCGAGAAAAGTGAAGAGCCCAGGACGAGACGTCATAAGAGCAGCTGTGGCCCGTACAAGCTTGTAGACCCCTCCCGTCGCTGAGAAGAGCTAATCAAACACAGTTTGAAATGGAAAGTACAAGTACATTCGTACTGCAAAGTCATATCTTGAAGATTTGACTACCATGCAATACCTG

**URA3-302_YALI0E26471g Deleted version of uniprot|Q12724 Yarrowia lipolytica Orotidine 5-phosphate decarboxylase**

CCAGAACGGCAGTGAGAATAGTAAAGGCGGTAGCGAGCTTCATTGTTGGATTGGAGGATTGGATAGTGGGTTGGTGCTCTTCAACGGGCCCGTCGATGGGGTTTATATCGTGTTTCTGGACAAGATACTATCCAGAAACTGCTCTGATTGCGTCACGAAACACGGCTCTCGCCAAGACGCGCCAAGACGATGCCCTCATTATCTTGGTGCAATACAGGTGGAGTGTGTGCATTAGTTGGTGCCGTGCCTTCTCACGATATCTGACAGGGGCTTGGGTTTGGGTTGGAAGTCGGATTCCGCTGAAACATGGTGTTGTGCAGATGTGAGTCTCTCAAAGTCGGTTCATCATACTCCATTGACATCATGGTACAGTGCGTACGTAAAAGATGGCCTGACTACAAGTAGTGGGATCTCTCTAACATTGTCCATCACATCGTAAATCACACCGCCTATCCATGAACCCTGATGCCGATCGTCGAAGTTAGACCAGGGCCAGTGGTGGGTAGCGTGGGGTAGGCTGCCACTGCCGTTGGAACCCCTTGTGTCCCTGGACTACAACTTAACCAACATGTCAGACAAAGGAGAGAAAAGTGTCCGCTCCACCGAACTGACGCCAGGAATGTACCGTGGCGCTCAAGAGGTCATGTGTAATTAAGGATACAAGATAAGCTGCGCCCTTGAATGCAAAAAGCACGCAGCTCATATGTTAATTTCCAATCAATGTTTCAGGGATGCATAGGACCCCGGATCGAGGTGGGCGGGAACAACGGTCTCGATAATGTACGTACACTACACACAAAGAGAAGCAAGTGGGGGCGGGACTGCACGGCACTTGTGAGACACCTCAGATTGTACCTGATACGCCTGAATATCGCAAATATTATGACTGTGTTGCAGGCTTGTCTTGACACTGTGTTCCGCTAGCCGGTGGATGTACCATCTATCAAACGGCTCTACGTACGTAACCCAAAACCCAAACTCTCCACGCGTTGCTGCTCTA***ACTGTCATCATAATTGTCGGCCGAGGTCTGTACGGCCAGAACCGAGATCCTATTGAGGAGGCCAAGCGATACCAGAAGGCTGGCTGGGAGGCTTACCAGAAGATTAACTGTTAG***AGGTTAGACTATGGATATGTAATTTAACTGTGTATATAGAGAGAGGTTAGACTATGGATATGTAATTTAACTGTGTATATAGAGAGCGTGCAAGTATGGAGCGCTTGTTCAGCTTGTATGATGGTCAGACGACCTGTCTGATCGAGTATGTATGATACTGCACAACCTGTGTATCCGCATGATCTGTCCAATGGGGCATGTTGTTGTGTTTCTCGATACGGAGATGCTGGGTACAAGTAGCTAATACGATTGAACTACTTATACTTATATGAGGCTTGAAGAAAGCTGACTTGTGTATGACTTATTCTCAACTACATCCCCAGTCACAATACCACCACTGCACTACCACTACACCAAAACCATGATCAAACCACCCATGGACTTCCTGGAGGCAGAAGAACTTGTTATGGAAAAGCTCAAGAGAGAGAAGCCAAGATACTATCAAGACATGTGTCGCAACTTCAAGGAGGACCAAGCTCTGTACACCGAGAAACAGGCCTTTGTCGACGAAGCTCTAAAGCTGAAACGGGACATCGAAAAGTTGGAGAAGTCAATCTGGAAACTACACGTAGAAAACAGACACCATCTCCAACAAGTACAGGACTTCAAATTTGCACTGAAGACATTCTGTGGGTGGAGCCATAAGTAACAATCGCCTGCTCCAGGAACTTAAAAAAGAGGCATTATAGGCCCCTTCATCTGAATATTCTTTGAGTACCAACTGCCGCCAACTCCCCAATCGTTAATTAGTGTTATCTATTCTATCTATGCTATTAGCACATATTTATCATGTGCTGCTGTTATGTACGGGTTCAATATACAAATGCTTAGTCCTCAAACACCTTCATAGGTGGGTCGTCTTCCTGGCCAAATCGAATTCTCATGATTTCAAACACGAACAGACCGATAGACGTAGACGGAAGCGCACTGAGGGTCGTCCAGCCACAACCATGGTATAGGTATCTGGGCCAACTCAACCGCAGACCCTTTCGGATGTTATTGGCTGTATGCAGAGTCTCAACGTAGGCTCGGTAGTAGAGATG

**XPR2-322_YALI0F31889g Deleted version of uniprot|P09230 Alkaline extracellular protease**

ATGTATAGTACTGTACCTTCAGTAGACTATTGTAGCTAACATGTCGTTGCGTGGCGTATGTACCAAGCCACAGAAATTATGTCAGAGATAAGGTCGCGACAGTTAGAGCAGCAACGCGTGGAGAGTTTGGGTTTTGGGTTACGTACGTAGAGCCGTTTGATAGATGGTACATCCACCGGCTAGCGGAACACAGTGTCAAGACAAGCCTGCAACACAGTCATAATATTTGCGATATTCAGGCGTATCAGGTACAATCTGAGGTGTCTCACAAGTGCCGTGCAGTCCCGCCCCCACTTGCTTCTCTTTGTGTGTAGTGTACGTACATTATCGAGACCGTTGTTCCCGCCCACCTCGATCCGGGGTCCTATGCATCCCTGAAACATTGATTGGAAATTAACATATGAGCTGCGTGCTTTTTGCATTCAAGGGCGCAGCTTATCTTGTATCCTTAATTACACATGACCTCTTGAGCGCCACGGTACATTCCTGGCGTCAGTTCGGTGGAGCGGACACTTTTCTCTCCTTTGTCTGACATGTTGGTTAAGTTGTAGTCCAGGGACACAAGGGGTTCCAACGGCAGTGGCAGCCTACCCCACGCTACCCACCACTGGCCCTGGTCTAACTTCGACGATCGGCATCAGGGTTCATGGATAGGCGGTGTGATTTACGATGTGATGGACAATGTTAGAGAGATCCCACTACTTGTAGTCAGGCCATCTTTTACGTACGCACTGTACCATGATGTCAATGGAGTATGATGAACCGACTTTGAGAGACTCACATCTGCACAACACCATGTTTCAGCGGAATCCGACTTCCAACCCAAACCCAAGCCCCTGTCAGATATCGTGAGAAGGCACGGCACCAACTAATGCACACACTCCACCTGTATTGCACCAAGATAATGAGGGCATCGTCTTGGCGCGTCTTGGCGAGAGCCGTGTTTCGTGACGCAATCAGAGCAGTTTCTGGATAGTATCTTGTCCAGAAACACGATATAA***ACCCCATCGACGGGCCCTGCCGCCGCTGCCTACTCATCTATTCTGTCCGTGGTCGCTAAGCAGTCCAAGAAGTTTAAGCACCACAAGCGAGATCTTGATGAGAAGGATCAGTTCATCGTTGTCTTTGACAGTAGCGCTACTGTTGACCAGATCGCCTCCGAAATCCAGAAGCTGGACTCTCTGGTCGACGAGGACTCGTCCAACGGTATCACCTCTGCTCTTGATCTTCCTGTCTACACGGATGGATCTGGCTTTCTCGGATTTGTTGGAAAGTTCAACTCCACTATCGTTGACAAGCTCAAGGAGTCGTCTGTTCTGACGGTCGAGCCCGATACCATTGTGTCTCTCCCCGAGATTCCTGCTTCTTCTAATGCCAAGCGAGCTATCCAGACTACTCCCGTCACTCAATGGGGCCTGTCTAGAATCTCTCATAAGAAGGCCCAGACTGGAAACTACGCCTACGTTCGAGAGACAGTTGGCAAGCACCCCACCGTTTCTTACGTTGTTGACTCTGGTATCCGAACCACCCACTCCGAGTTCGGAGGCCGAGCTGTCTGGGGAGCCAACTTCGCTGACACACAGAACGCTGATCTTCTCGGTCACGGCACTCACGTTGCAGGTACCGTGGGAGGAAAGACATACGGAGTCGACGCCAACACCAAGCTGGTGGCCGTCAAGGTGTTTGCAGGCCGATCCGCAGCTCTCTCCGTCATCAACCAGGGCTTCACCTGGGCTCTCAACGACTACATCTCCAAGCGAGACACTCTGCCTCGAGGAGTGCTGAACTTCTCTGGAGGAGGACCCAAGTCCGCTTCCCAGGACGCCCTATGGTCTCGAGCTACCCAGGAGGGTCTGCTTGTCGCCATCGCTGCGGGAAACGATGCCGTGGACGCCTGTAACGACTCTCCCGGTAACATTGGAGGCTCCACCTCTGGTATCATCACTGTGGGTTCCATTGACTCTAGCGATAAGATCTCCGTCTGGTCCGGTGGACAGGGATCCAACTACGGAACTTGTGTTGATGTCTTTGCCCCCGGCTCCGATATCATCTCTGCCTCTTACCAGTCCGACTCTGGTACTTTGGTCTACTCCGGTACCTCCATGGCCTGTCCCCACGTTGCCGGTCTTGCCTCCTACTACCTGTCCATCAATGACGAGGTTCTCACCCCTGCCCAGGTCGAGGCTCTTATTACTGAGTCCAACACCGGTGTTCTTCCCACCACCAACCTCAAGGGCTCTCCCAACGCTGTTGCCTACAACGGTGTTGGCATTTAG***GCAATTAACAGATAGTTTGCCGGTGATAATTCTCTTAACCTCCCACACTCCTTTGACATAACGATTTATGTAACGAAACTGAAATTTGACCAGATATTGTTGTAAATAGAAAATCTGGCTTGTAGGTGGCAAAATCCCGTCTTTGTTCATCAATTCCCTCTGTGACTACTCGTCATCCCTTTATGTTCGACTGTCGTATTTTTATTTTCCATACATACGCAAGTGAGATGCCCGTGTCCGAATTCGGCAGTCGCATGGACTATCGGTTGCTCTGTACATACACATACGCGAGGCTGGAACCTATATCAGAGCACTACTTGTAGGGTTGATGTAACATTCAAGAAAAGCGCAAGCCAGTGGGTGATGTATAGCAGCTACAGCAACTACTGCTCAACATGAAAAAGGAGGGTGTTAAGACGGCCAAGACTGCTTTCTTGCTACGCCTGAGCAACGTAGCTCTGCAACAGAGCAACAGATAATCGCCTACGGAGACAGAGACAGAGACAGAAACAGAAACAAAAGCAACAGAAACTGCTGTAGTGTGTTGCAGTGAGGCGGAGATTTAACCGTATAATTCACGCTCAGATCTTATAGGGTCTTCATTTGCTCTTCTCACCAGTTCGAGTATAAGGTAGCCTGTTGCTATGGCTACCCCGGATTTTTTAAATGCCGCAGTATTCCCGCGCCCAGATGTATCCCGTGCCCAAAACTTATTTCGCTAGGCTACACTGTGATCGTCGGAGTTAGAAGGGCTTAAGAGTATAATCAATACAGACCTGGCCTGTGTTTCAGAATATTGCTCAACCCGGGTTATTGAGACACTGTCCGATTATTCCTTGTCGTTGCCTCTCCAGACCGATGAGATTCTTCTGCTTGTGGTGTATAGAAACGCCACCTCTTCGTTTGTTCTGCCATTTTCTGTTGAGTATCTTAAAAGTGGCTGTTGAGTGTTGGGTTTTGGTTTTTTTTCCCGCCAGGCGACGACTCAGTGTGCGTAAAT

**Additional Figures**

**Figure S1:** Schematic structure of the newly created zeta docking platform at the LEU2 locus, devoid of bacterial elements and antibiotic resistance gene (AmpR)

**
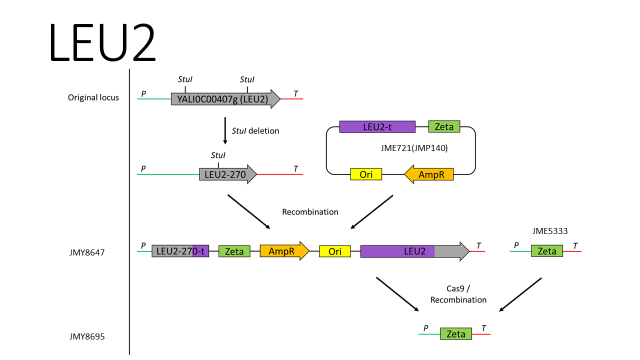
**

**Figure S2:** PCR verification of the presence or absence of the bacterial *AmpR* gene in genomic DNA extracted from the different yeast strains. PCR was performed using two sets of primers: AMP (698 bp) and *MHY1* (1133 bp). As expected, AMP amplification (698 bp) was detected only in the first three strains (Y1212, Y7126, and Y8647), while *MHY1* amplification (1133 bp) was observed in all strains.


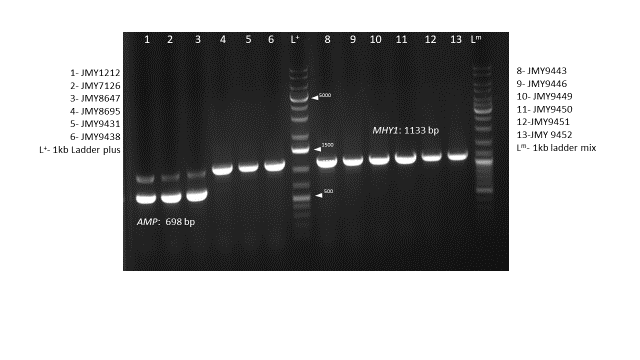


**Figure S3:** Schematic representation of the PT synthetic disruption cassettes used for gene deletion. NotI sites were introduced at the 5′ and 3′ ends of the disruption cassettes. 'P' represents the promoter region, spanning from -100 bp to -700 bp upstream of the START codon (600 bp), while 'T' represents the terminator region, ranging from +100 bp to +700 bp downstream of the STOP codon (600 bp). All BsaI sites present in the P and T fragments were mutated, whereas two BsaI sites (indicated by pink arrows) were introduced between the P and T regions


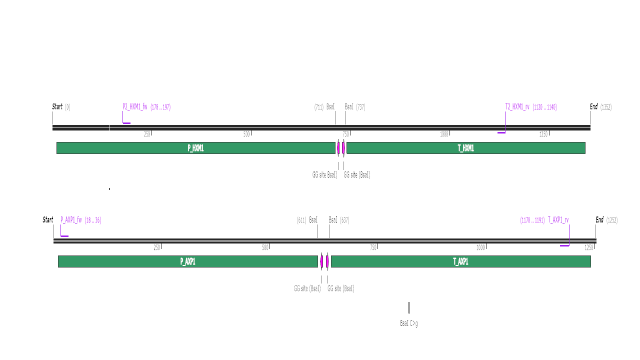


**Figure S4:** Exemplary plate showing routine check of amylolytic activity in the JMY9438 and JMY9451-derivative strains. Starch-containing YPD plate (1% of soluble starch). YPD plate containing starch after 3 days of incubation at 28°C. The plate was stained with iodine vapor. The strains able to clarify starch were distinguished by the clear zone around the colonies. Each row represents a quadruplicate of a strain indicated on the right side of the image. No hydrolysis around (absence of iodin coloration) the Y9438 and Y9451 control strains show that the parental strains do not possess amylolytic activity.


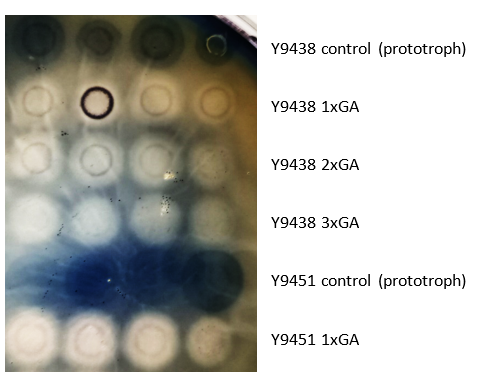


**Figure S5:** Final amounts of glycerol consumed (A) and concentration of MAN and ERY at the end (72 h) of batch cultures of Y9428 and Y9451 strains (and GA-bearing derivatives) in YPG medium with (out) of the inducer (ERY).

**Figure S6:** Growth of the Y9438 and Y9451 strains (and derivatives) in batch cultures in 3xYNB+D.O. medium and YPG medium.

REferences

1. Park YK, Vandermies M, Soudier P, Telek S, Thomas S, Nicaud JM, et al. Efficient expression vectors and host strain for the production of recombinant proteins by Yarrowia lipolytica in process conditions. Microb Cell Fact [Internet]. 2019;18:167. Available from: https://doi.org/10.1186/s12934-019-1218-6

2. Vidal L, Dong Z, Olofsson K, Nordberg Karlsson E, Nicaud JM. Production of Rhizopus oryzae lipase using optimized Yarrowia lipolytica expression system. FEMS Yeast Res. 2023;23.

3. Fickers P, Le Dall MT, Gaillardin C, Thonart P, Nicaud JM. New disruption cassettes for rapid gene disruption and marker rescue in the yeast Yarrowia lipolytica. J Microbiol Methods. 2003;55:727–37.

4. Larroude M, Trabelsi H, Nicaud JM, Rossignol T. A set of Yarrowia lipolytica CRISPR/Cas9 vectors for exploiting wild-type strain diversity. Biotechnol Lett [Internet]. 2020;42:773–85. Available from: https://doi.org/10.1007/s10529-020-02805-4

5. Vidal L, Lebrun E, Park YK, Mottet G, Nicaud JM. Bidirectional hybrid erythritol-inducible promoter for synthetic biology in Yarrowia lipolytica. Microb Cell Fact. 2023;22.
